# Supplementary material for: Two novel isomeric organic anion-water aggregations: 1D tape and 3D 2-fold interpenetrated diamond network
Source: Royal Society of Chemistry journal article supplement (doi:10.1039/c1ra00695a), 2011-01-01

## Electronic Supplementary Information (ESI) for RSC Advances

# Two Novel Isomeric Organic Anion-Water aggregations: 1D Tape and 3D 2-fold Interpenetrated Diamond Network

Tuoping Hu,<sup>\*,a</sup> Xiaoliang Zhao,<sup>b</sup> Xiaoqin Hu,<sup>b</sup> Yumin Xu,<sup>b</sup> Di Sun,<sup>\*,b</sup> Daofeng Sun<sup>\*,b</sup>

<sup>a</sup>Department of Chemistry, North University of China, Taiyuan, Shanxi 030051, (P. R. China),

Email: hutuopingsx@yahoo.com.cn;

<sup>b</sup>School of Chemistry and Chemical Engineering, Shandong University, Jinan, Shandong, 250100, China.

Email: dsun@sdu.edu.cn; dfsun@sdu.edu.cn;

## Content

|                                                                                                                                    |    |
|------------------------------------------------------------------------------------------------------------------------------------|----|
| (1) Experiment details.....                                                                                                        | 2  |
| (2) Synthesis of 1 and 2 .....                                                                                                     | 3  |
| (3) X-ray Crystallography .....                                                                                                    | 4  |
| (4) Table S1: Crystal data for 1 and 2.....                                                                                        | 5  |
| (5) Table S2: The selected bond distances and angles for 1 and 2.....                                                              | 6  |
| (6) Fig. S1: The TGA curve of 1 and 2.....                                                                                         | 7  |
| (7) Fig. S2: The $R_5^5(14)$ motif in the 1D imdn-water aggregation of 1.....                                                      | 8  |
| (8) Fig. S3: The adjacent independent tetrahedral nodes with a separation of 11.46 Å in 2 ....                                     | 9  |
| (9) Fig. S4: The relationship between the 2D coordination nets (green) and 3D supramolecular diamond nets (red and blue) in 2..... | 10 |

Electronic Supplementary Information (ESI) for *RSC Advances*

**(1) Experiment details**

Materials and General Methods.

All chemicals and solvents used in the syntheses were of analytical grade and used without further purification. Elemental analyses (C, H, N) were obtained on a Perkin-Elmer 240 elemental analyzer. Thermal gravimetric analysis (TGA) was performed under N<sub>2</sub> on a Perkin Elmer TGA 7 instrument.

## (2) Synthesis of **1** and **2**

### Synthesis of $\{[\text{Co}(\text{2,2'}\text{-bpy})_3][(\text{imdn})_2(\text{H}_2\text{O})_4]\}$ . (**1**)

Mixture of  $\text{Co}(\text{NO}_3)_2 \cdot 6\text{H}_2\text{O}$  (30 mg, 0.10 mmol), Himdn (15 mg, 0.13 mmol) and tetrabutyl ammonium bromide (5 mg, 0.016 mmol) was dissolved in 5 mL water, which was added into the cuvette containing 2,2'-bpy (30 mg, 0.19 mmol) in the bottom. The mixtures were capped and allowed to stand at room temperature until crystals formed within ten days. The crystals were isolated by filtration and dried in air. Yield: *Ca.* 69% based on Co. Elemental analysis: Anal. Calc. for  $\text{C}_{40}\text{H}_{34}\text{CoN}_{14}\text{O}_4$ : C 57.62, H 4.11, N 23.52 %. Found: C 57.76, H 4.14, N 24.36 %.

### Synthesis of $\{[\text{Co}(\text{4,4'}\text{-bpy})_2][(\text{imdn})_2(\text{H}_2\text{O})_4]\}_n$ . (**2**):

Synthesis of **2** is the similar to that of **1**, but using 4,4'-bpy (30 mg, 0.19 mmol) instead of 2,2'-bpy. The crystals were isolated by filtration and dried in air. Yield: *Ca.* 78% based on Co. Anal. Calc. for  $\text{C}_{30}\text{H}_{26}\text{CoN}_{12}\text{O}_4$ : C 53.18, H 3.87, N 24.81 %. Found: C 53.01, H 3.57, N 25.01%.

### **(3) X-ray Crystallography**

Single crystals of the complexes **1-2** with appropriate dimensions were chosen under an optical microscope and mounted on a glass fiber for data collection. X-ray crystallography: Single-crystal X-ray diffraction was performed using a Bruker Apex II CCD diffractometer equipped with a fine-focus sealed-tube X-ray source (Mo K $\alpha$  radiation, graphite monochromated). Structures were solved by direct methods using SHELXTL and were refined by full matrix least squares on  $F^2$  using SHELX-97. All the non-hydrogen atoms were treated anisotropically. Hydrogen atoms were placed in calculated positions with isotropic displacement parameters set to 1.2  $U_{eq}$  of the attached atom.

Electronic Supplementary Information (ESI) for *RSC Advances*

**(4) Table S1: Crystal data for 1 and 2**

| Compound                                                                                                | <b>1</b>                                                          | <b>2</b>                                                          |
|---------------------------------------------------------------------------------------------------------|-------------------------------------------------------------------|-------------------------------------------------------------------|
| Empirical formula                                                                                       | C <sub>40</sub> H <sub>34</sub> CoN <sub>14</sub> O <sub>4</sub>  | C <sub>30</sub> H <sub>26</sub> CoN <sub>12</sub> O <sub>4</sub>  |
| Formula weight                                                                                          | 833.74                                                            | 677.56                                                            |
| Crystal system                                                                                          | Monoclinic                                                        | Tetragonal                                                        |
| Space group                                                                                             | <i>P</i> 2 <sub>1</sub> / <i>c</i>                                | <i>I</i> 4 <sub>1</sub> <i>cd</i>                                 |
| <i>a</i> (Å)                                                                                            | 9.8648(9)                                                         | 16.2028(3)                                                        |
| <i>b</i> (Å)                                                                                            | 29.440(2)                                                         | 16.2028(3)                                                        |
| <i>c</i> (Å)                                                                                            | 13.9210(13)                                                       | 24.4818(9)                                                        |
| $\beta$ (deg)                                                                                           | 94.890(2)                                                         | 90                                                                |
| <i>V</i> (Å <sup>3</sup> )                                                                              | 4028.2(6)                                                         | 6427.2(3)                                                         |
| <i>T</i> (K)                                                                                            | 173(2)                                                            | 173(2)                                                            |
| <i>Z</i> , <i>D</i> <sub>calcd</sub> (Mg/m <sup>3</sup> )                                               | 4, 1.375                                                          | 8, 1.400                                                          |
| <i>F</i> (000)                                                                                          | 1724                                                              | 2792                                                              |
| $\mu$ (mm <sup>-1</sup> )                                                                               | 0.486                                                             | 0.590                                                             |
| Ref. collected/unique                                                                                   | 19965 / 7084                                                      | 12005 / 3147                                                      |
| <i>R</i> <sub>int</sub>                                                                                 | 0.0484                                                            | 0.0595                                                            |
| Parameters                                                                                              | 532                                                               | 214                                                               |
| Final <i>R</i> indices [ <i>I</i> > 2σ( <i>I</i> )]                                                     | <i>R</i> <sub>1</sub> = 0.0423<br><i>wR</i> <sub>2</sub> = 0.0918 | <i>R</i> <sub>1</sub> = 0.0372<br><i>wR</i> <sub>2</sub> = 0.0743 |
| <i>R</i> indices (all data)                                                                             | <i>R</i> <sub>1</sub> = 0.0681<br><i>wR</i> <sub>2</sub> = 0.1040 | <i>R</i> <sub>1</sub> = 0.0799<br><i>wR</i> <sub>2</sub> = 0.0891 |
| GOF                                                                                                     | 1.013                                                             | 0.988                                                             |
| Completeness (%)                                                                                        | 99.9                                                              | 99.9                                                              |
| Max./ min., Δρ (e·Å <sup>-3</sup> )                                                                     | 0.275 / -0.288                                                    | 0.246 / -0.357                                                    |
| $R_1 = \sum   F_o  -  F_c   / \sum  F_o $ , $wR_2 = [\sum w(F_o^2 - F_c^2)^2] / \sum w(F_o^2)^2]^{1/2}$ |                                                                   |                                                                   |

Electronic Supplementary Information (ESI) for *RSC Advances*

**(5) Table S2: The selected bond distances and angles for 1 and 2**

|                                                                                          |             |                                         |            |
|------------------------------------------------------------------------------------------|-------------|-----------------------------------------|------------|
| <b>Compound 1</b>                                                                        |             |                                         |            |
| Co1—N2                                                                                   | 2.109 (2)   | Co1—N1                                  | 2.132 (2)  |
| Co1—N6                                                                                   | 2.1164 (19) | Co1—N4                                  | 2.140 (2)  |
| Co1—N5                                                                                   | 2.126 (2)   | Co1—N3                                  | 2.154 (2)  |
| N2—Co1—N6                                                                                | 98.92 (8)   | N5—Co1—N4                               | 97.05 (8)  |
| N2—Co1—N5                                                                                | 93.04 (8)   | N1—Co1—N4                               | 95.31 (8)  |
| N6—Co1—N5                                                                                | 77.05 (8)   | N2—Co1—N3                               | 93.90 (8)  |
| N2—Co1—N1                                                                                | 76.94 (8)   | N6—Co1—N3                               | 97.38 (8)  |
| N6—Co1—N1                                                                                | 171.48 (8)  | N5—Co1—N3                               | 171.71 (8) |
| N5—Co1—N1                                                                                | 95.61 (8)   | N1—Co1—N3                               | 90.37 (7)  |
| N2—Co1—N4                                                                                | 167.86 (8)  | N4—Co1—N3                               | 76.63 (8)  |
| N6—Co1—N4                                                                                | 89.93 (7)   |                                         |            |
| <b>Compound 2</b>                                                                        |             |                                         |            |
| Co1—O2W                                                                                  | 2.043 (6)   | Co1—N2 <sup>ii</sup>                    | 2.166 (2)  |
| Co1—O1W                                                                                  | 2.065 (5)   | Co1—N1 <sup>iii</sup>                   | 2.202 (2)  |
| Co1—N2 <sup>i</sup>                                                                      | 2.166 (2)   | Co1—N1                                  | 2.202 (2)  |
| O2W—Co1—O1W                                                                              | 180.000 (1) | N2 <sup>i</sup> —Co1—N1 <sup>iii</sup>  | 89.40 (9)  |
| O2W—Co1—N2 <sup>i</sup>                                                                  | 90.19 (13)  | N2 <sup>ii</sup> —Co1—N1 <sup>iii</sup> | 90.60 (9)  |
| O1W—Co1—N2 <sup>i</sup>                                                                  | 89.81 (13)  | O2W—Co1—N1                              | 90.11 (13) |
| O2W—Co1—N2 <sup>ii</sup>                                                                 | 90.19 (13)  | O1W—Co1—N1                              | 89.89 (13) |
| O1W—Co1—N2 <sup>ii</sup>                                                                 | 89.81 (13)  | N2 <sup>i</sup> —Co1—N1                 | 90.60 (9)  |
| N2 <sup>i</sup> —Co1—N2 <sup>ii</sup>                                                    | 179.6 (3)   | N2 <sup>ii</sup> —Co1—N1                | 89.40 (9)  |
| O2W—Co1—N1 <sup>iii</sup>                                                                | 90.11 (13)  | N1 <sup>iii</sup> —Co1—N1               | 179.8 (3)  |
| Symmetry codes: (i) $-x+1/2, y+1/2, z$ ; (ii) $x+1/2, -y-1/2, z$ ; (iii) $-x+1, -y, z$ . |             |                                         |            |

(6) Fig. S1: The TGA curve of 1 and 2

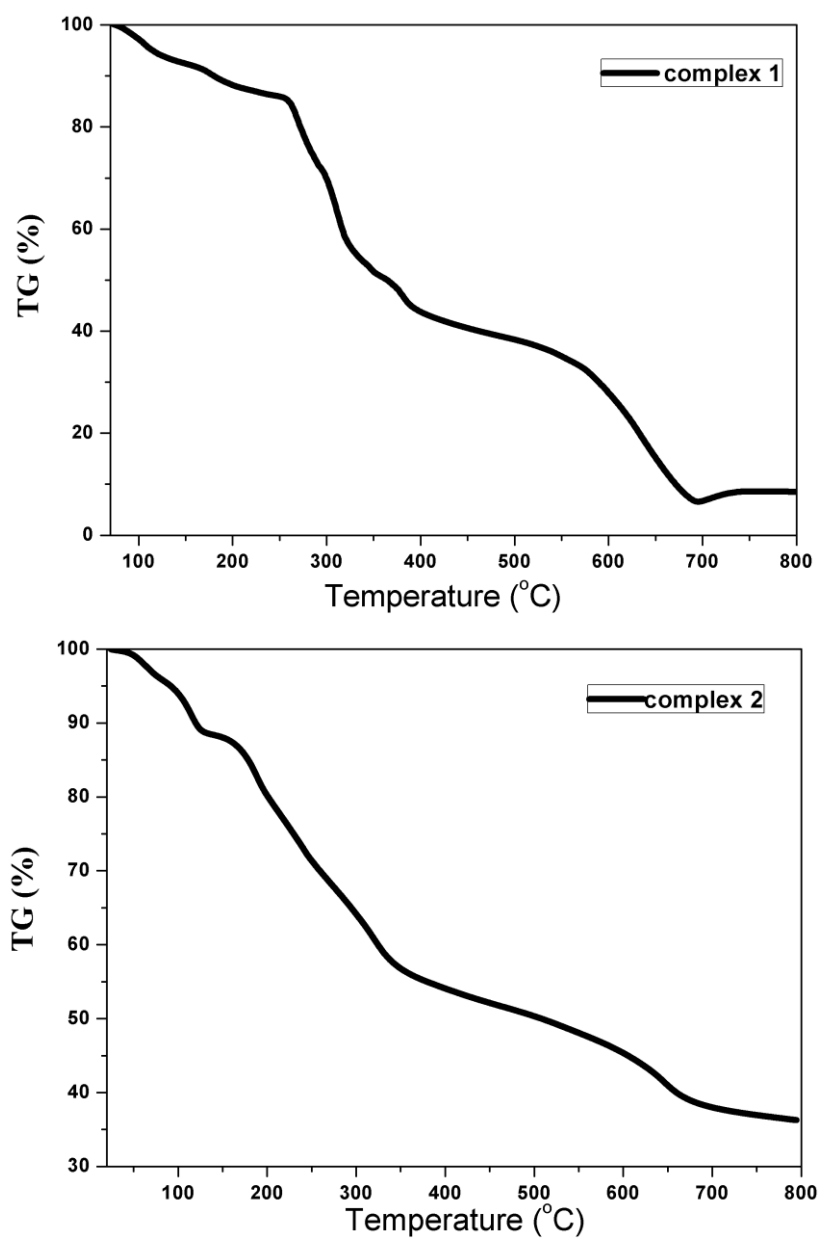

(7) Fig. S2: The  $R_5^5(14)$  motif in the 1D imdn-water aggregation of **1**

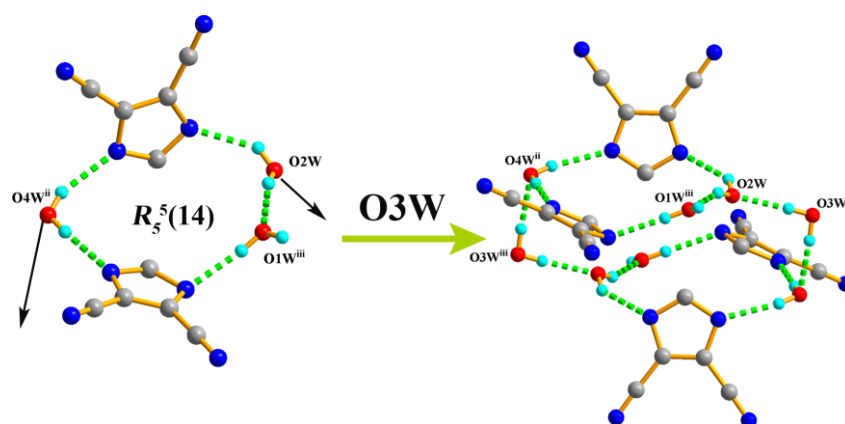

(8) Fig. S3: The adjacent independent tetrahedral nodes with a separation of

11.46 Å in 2

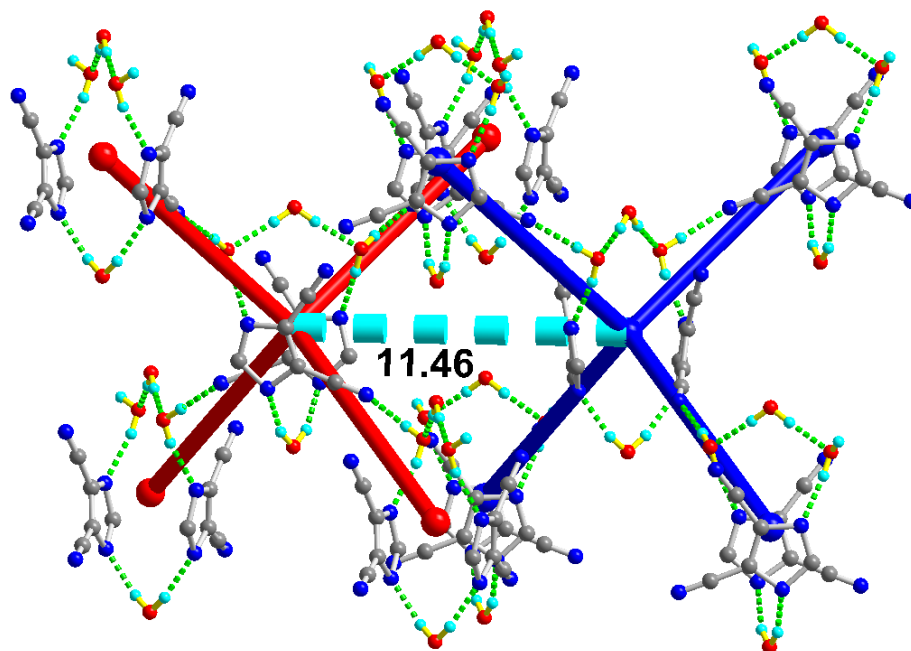

**(9) Fig. S4: The relationship between the 2D coordination nets (green) and 3D supramolecular diamond nets (red and blue) in 2**

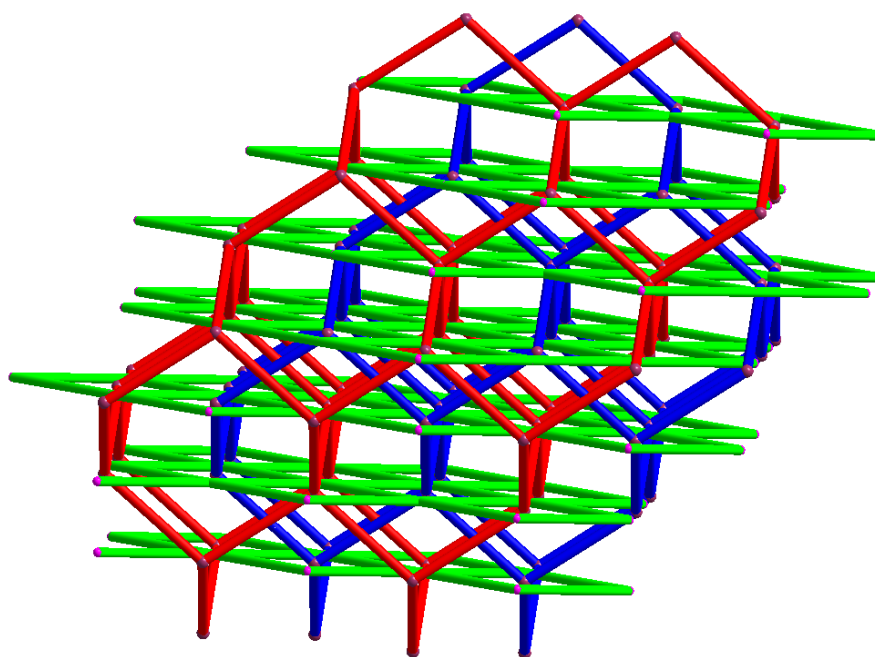

Supplement: c1ra00695a.pdf [file c1ra00695a.pdf]
